# Supplementary material for: A Fuzzy-Based Model to Predict the Spatio-Temporal Performance of the Dolichogenidea gelechiidivoris Natural Enemy against Tuta absoluta under Climate Change
Source: MDPI journal article supplement (doi:10.3390/biology11091280), 2022-08-28
Supplement: s1 [file s1]

## Supplementary

**Table S1.** Description of LULC classes of the study

| Land Cover       | Description                                                                                                                                                                    |
|------------------|--------------------------------------------------------------------------------------------------------------------------------------------------------------------------------|
| <b>Barren</b>    | Lands with exposed soil, sand, or rocks and never has more than 10% vegetated cover during any time of the year.                                                               |
| <b>Built up</b>  | Land covered by buildings and other manmade structures.                                                                                                                        |
| <b>Cropland</b>  | Lands covered with temporary crops followed by harvest and a bare soil period (e.g., Single and multiple cropping systems).                                                    |
| <b>Forest</b>    | Refer to land with a tree canopy cover of more than 10 percent.                                                                                                                |
| <b>Grassland</b> | Dominated by herbaceous annuals (<2m).                                                                                                                                         |
| <b>Savanna</b>   | Tree cover 10-30% (canopy >2m).                                                                                                                                                |
| <b>Shrubs</b>    | Woody perennial plants with persistent and woody stems and without any defined main stem being less than 5 metre tall. The shrub foliage can be either evergreen or deciduous. |
| <b>Water</b>     | At least 60% of area is covered by permanent water bodies.                                                                                                                     |
| <b>Wetlands</b>  | Permanently inundated lands with 30-60% water cover and >10% vegetated cover.                                                                                                  |

**Table S2.** Landcover statistics

| Classes          | Area (km2)       | Proportion % |
|------------------|------------------|--------------|
| <b>Forest</b>    | 5735.1           | 2.02         |
| <b>Shrubs</b>    | 5523.46          | 1.94         |
| <b>Savanna</b>   | 14387.02         | 5.06         |
| <b>Grassland</b> | 143013.82        | 50.28        |
| <b>Wetlands</b>  | 973.18           | 0.34         |
| <b>Cropland</b>  | 106978.82        | 37.61        |
| <b>Built up</b>  | 404.5            | 0.14         |
| <b>Barren</b>    | 144.47           | 0.05         |
| <b>Water</b>     | 7300.7           | 2.57         |
| <b>Total</b>     | <b>284461.06</b> | <b>100</b>   |

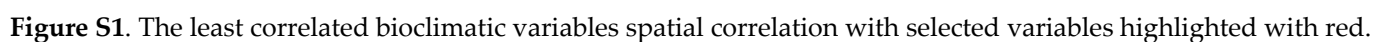

| Reference |        |        |         |           |          |          |       |        |       |        |
|-----------|--------|--------|---------|-----------|----------|----------|-------|--------|-------|--------|
| Cat       | Forest | Shrubs | Savanna | Grassland | Wetlands | Cropland | Built | Barren | Water | Row    |
|           |        |        |         |           |          |          | up    |        |       | Sum    |
| Forest    | 28958  | 0      | 509     | 0         | 0        | 51       | 0     | 0      | 0     | 29518  |
| Shrubs    | 0      | 4940   | 0       | 8714      | 0        | 176      | 0     | 0      | 0     | 13830  |
| Savanna   | 215    | 0      | 18764   | 456       | 0        | 133      | 0     | 0      | 0     | 19568  |
| Grassland | 0      | 0      | 2056    | 20033     | 0        | 34       | 0     | 0      | 0     | 22123  |
| Wetlands  | 0      | 0      | 550     | 0         | 1130     | 42       | 0     | 0      | 0     | 1722   |
| Cropland  | 0      | 0      | 0       | 0         | 0        | 81562    | 0     | 0      | 0     | 81562  |
| Built up  | 0      | 0      | 0       | 0         | 0        | 85       | 2411  | 0      | 0     | 2496   |
| Barren    | 0      | 0      | 0       | 524       | 227      | 0        | 0     | 885    | 0     | 1636   |
| Water     | 0      | 0      | 0       | 0         | 277      | 0        | 0     | 0      | 71767 | 72044  |
| Col Sum   | 29173  | 4940   | 21879   | 29727     | 1634     | 82083    | 2411  | 885    | 71767 | 244499 |
| Kappa     |        |        |         | 0.92      |          |          |       |        |       |        |
| Overall   |        |        |         | 94.25     |          |          |       |        |       |        |
| Accuracy  |        |        |         |           |          |          |       |        |       |        |

**Table S4.** Selected non-colinear variables used to predict the habitat suitability for *Tuta absoluta* using the MaxEnt model.

| Selected variable | description                                          | Unit        |
|-------------------|------------------------------------------------------|-------------|
| Bio1              | Annual Mean Temperature                              | °C          |
| Bio4              | Temperature Seasonality<br>(standard deviation ×100) | °C          |
| Bio7              | Temperature Annual Range<br>(BIO5-BIO6)              | °C          |
| Bio12             | Annual Precipitation                                 | mm          |
| Bio14             | Precipitation of Driest Month                        | mm          |
| LULC              | Land use land cover                                  | Categorical |

**Table S5.** Temperature-based performance of the parasitoid *Dolichogenidea gelechiidivoris*.

| Temperature (°C) | Net reproductive rate ( $R_0$ ) |
|------------------|---------------------------------|
| 10               | 0.13                            |
| 15               | 1.55                            |
| 20               | 14.99                           |
| 25               | 14.25                           |
| 30               | 2.18                            |
| 35               | 0.06                            |

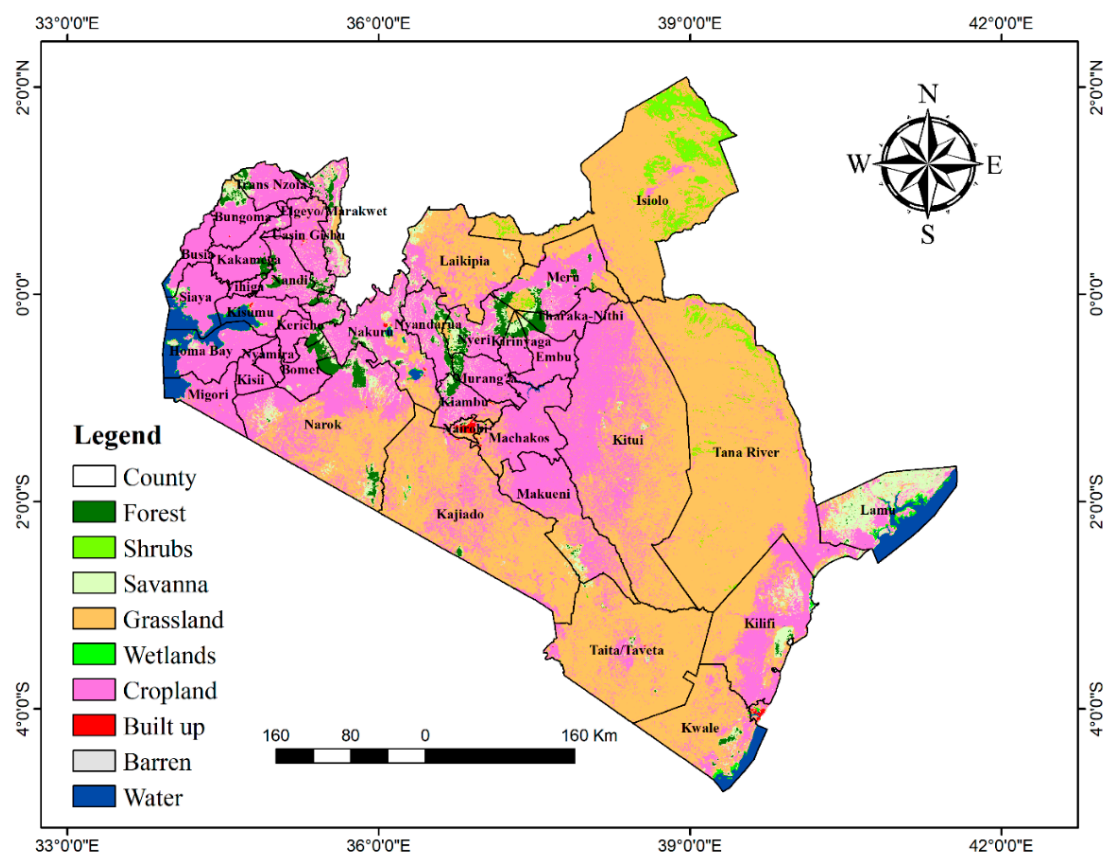

**Figure S2.** Classified LULC map for different years based on nine classes extracted from the study area with a proportionate coverage area.

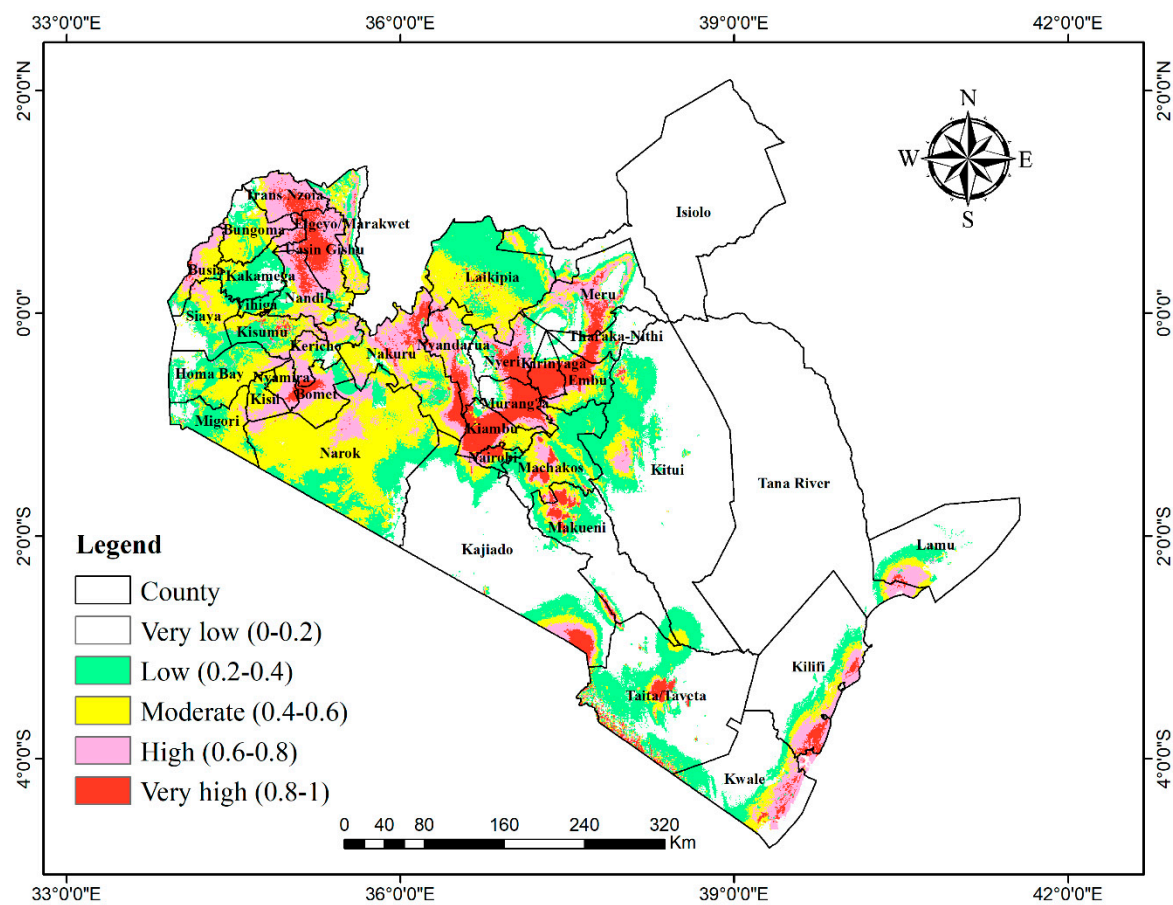

**Figure S3.** Map of suitability areas of *T. absoluta* for the classified LULC in the strategic tomato production areas.
